1 **Phosphorus uptake and toxicity is delimited by mycorrhizal symbiosis in P-sensitive *Eucalyptus***  
2 ***marginata* but not in P-tolerant *Acacia celastrifolia***

3

4 Mark Tibbett<sup>a,b</sup>, Matthew I. Daws<sup>a,\*</sup> & Megan H. Ryan<sup>c</sup>

5

6 <sup>a</sup>Department of Sustainable Land Management and Soil Research Centre, School of Agricultural  
7 Policy and Development, University of Reading, Berkshire RG6 6AR, UK

8 <sup>b</sup>School of Biological Sciences, The University of Western Australia, Crawley, WA, AUSTRALIA.

9 <sup>c</sup>School of Agriculture and Environment, University of Western Australia, 35 Stirling Highway,  
10 Crawley 6009, AUSTRALIA

11 \*Corresponding author

12 Email: [matthew.daws@alcoa.com](mailto:matthew.daws@alcoa.com)

1 **Abstract**

2 Many plant species from regions with ancient, highly-weathered nutrient-depleted soils have  
3 specialised adaptations for acquiring P and are sensitive to excess P-supply. Mycorrhizal associations  
4 may regulate P-uptake at high external P-concentrations, potentially reducing P-toxicity. We predicted  
5 that excess P-application will negatively impact species from the nutrient-depleted jarrah forest of  
6 Western Australia and that mycorrhizal inoculation will reduce P-toxicity by regulating P-uptake. For  
7 seedlings of the N<sub>2</sub>-fixing legume *Acacia celastrifolia* and the tree species *Eucalyptus marginata*, we  
8 measured growth at P-concentrations of 0 to 90 mg kg<sup>-1</sup> soil and in relation to inoculation with the  
9 arbuscular mycorrhizal fungus (AMF) *Rhizophagus irregularis*. Non-inoculated *A. celastrifolia*  
10 maintained leaf P-concentrations at <2 mg g<sup>-1</sup> dry mass (DM) across the range of external P-  
11 concentrations. However, for non-inoculated *E. marginata*, as external P-concentrations increased leaf  
12 P also increased, reaching >9 mg g<sup>-1</sup> DM at 30 mg P kg<sup>-1</sup> soil. *A. celastrifolia* DM increased with  
13 increasing external P-concentrations, while *E. marginata* DM was maximal at 15 mg P kg<sup>-1</sup> soil,  
14 declining at higher external P concentrations. Neither DM nor leaf P of *A. celastrifolia* were affected  
15 by inoculation with AMF. For *E. marginata*, even at 90 mg P kg<sup>-1</sup> soil, inoculation with AMF resulted  
16 in leaf P remaining <1 mg g<sup>-1</sup> DM, and DM being maintained. These data strengthen the evidence base  
17 that AMF may not only facilitate P-uptake at low external P-concentrations, but are also important for  
18 moderating P-uptake at elevated external P-concentrations and maintaining plant P concentrations  
19 within a relatively narrow concentration range.

20

21 **Keywords:** *Acacia*; fertiliser; rehabilitation; restoration, P accumulation, P-toxicity, P-use  
22 **efficiency, mycorrhiza**

## 1           **1. INTRODUCTION**

2   Ancient and highly weathered soils, such as those found in SW Western Australia, have naturally low  
3   phosphorus (P) concentrations. Many plants adapted to growth under these low P-conditions have  
4   evolved a range of strategies for P-acquisition, including cluster roots and exudation of carboxylates  
5   and phosphatases (Lambers *et al.*, 2006, 2008). A range of species also form associations with  
6   arbuscular mycorrhizal fungi (AMF), the extensive mycelial development of which expand the volume  
7   of soil from which nutrients can be scavenged (Tibbett, 2000; Tibbett & Sanders, 2002; Smith *et al.*,  
8   2015).

9           Species adapted to naturally low soil P concentrations may display symptoms of P-toxicity  
10   when supplied with P concentrations above those that they experience naturally in soil (Handreck,  
11   1991; Lambers *et al.*, 2002; Shane *et al.*, 2004a; Standish *et al.*, 2007; Pang *et al.*, 2010; de Campos *et al.*,  
12   2013; Williams *et al.*, 2019), due potentially to the loss of low affinity transporter systems (Huang  
13   *et al.*, 2011). P-sensitive species occur in a range of families, including the Fabaceae, Haemodoraceae,  
14   Myrtaceae, Proteaceae and Rutaceae. Symptoms of P-sensitivity are highly species-specific and occur  
15   at shoot P-concentrations less than 1 mg g<sup>-1</sup> dry mass (DM) to more than 40 mg P g<sup>-1</sup> DM (Shane *et al.*  
16   *et al.*, 2004b and references therein). Symptoms of P toxicity include a reduction in growth with  
17   increasing external P (e.g., Standish *et al.*, 2007; Williams *et al.*, 2019) and visible symptoms  
18   including early leaf senescence and necrotic and chlorotic regions on leaves (e.g., Handreck, 1991;  
19   Lambers *et al.*, 2002; Shane *et al.*, 2004ab; Kariman *et al.*, 2014a; Ye *et al.*, 2021).

20           Mycorrhizal symbioses are well known for increasing P-uptake in nutrient deficient soils and  
21   increasing the P-status of host plants (Bougher *et al.*, 1990; Koide & Mosse, 2004; Smith *et al.*, 2011;  
22   Kariman *et al.*, 2018). However, they can also enable the growth of plants in soils containing toxic  
23   concentrations of heavy metals or certain essential trace elements such as cadmium and zinc, by  
24   controlling the uptake of metal ions (Jentschke & Godbold, 2000; Hildebrandt *et al.*, 2007; de Oliveira  
25   *et al.*, 2020; Yazici *et al.*, 2021). Similarly, AMF can modify P uptake in the host plant by reducing  
26   the expression of genes encoding high-affinity phosphate transporter proteins. While mycorrhizal  
27   associations can increase plant shoot P concentrations by increasing uptake at low P-availability and  
28   enabling exploitation of a greater soil volume (Tibbett, 2000), there is increasing evidence, at least for  
29   arbuscular mycorrhizal fungi (AMF), that they can also moderate shoot-P at high P-availability. For  
30   example, Nazeri *et al.* (2014) demonstrated, for a range of legume species, that inoculation with AMF  
31   could maintain shoot P concentrations within relatively narrow boundaries following the application of  
32   a single pulse of P. This effect was modulated by both mycorrhizal related reductions in rhizosphere  
33   carboxylates and P transport from roots to shoots.

34           Jarrah (*Eucalyptus marginata*) is a dominant overstorey tree in the jarrah forest of south west  
35   Western Australia and, based on pot experiments, is known to be sensitive to elevated external P  
36   (Kariman *et al.*, 2014a, 2016). For example, in the absence of inoculation with AMF, Kariman *et al.*  
37   (2014a) reported the onset of leaf chlorosis and necrosis in the week following application of a pulse

1 of P to jarrah seedlings. When seedlings were inoculated with AMF visible symptoms associated with  
2 P-toxicity and shoot-P concentrations were reduced. While studies have largely focused on visible  
3 phytotoxicity symptoms resulting from P-application (e.g., Handreck, 1991; Lambers *et al.*, 2002;  
4 Shane *et al.*, 2004b; Kariman *et al.*, 2014a), a recent study by Williams *et al.* (2019) demonstrated that  
5 P-toxicity can also be expressed as a significant reduction in growth rates at shoot-P concentrations  
6 that do not necessarily result in visible symptoms. Consequently, there is a need to better understand  
7 both longer-term effects of applying P and potential interactions of AMF on shoot-P concentrations  
8 and plant growth.

9 For jarrah these observations in relation to P may also have significant practical implications:  
10 large areas of jarrah forest are cleared and restored each year following bauxite mining. Fertiliser  
11 application (especially P), to maximise early plant growth, is generally viewed as a key step in the  
12 rehabilitation process (Ward *et al.*, 1990; Grant *et al.*, 2007; Tibbett, 2010). However, there may be  
13 the potential for negative impacts on plant growth from applying excess P, particularly given newly  
14 restored forest have low species diversity and abundance of AMF (Gardner & Malajckuk, 1988; Glen  
15 *et al.*, 2008). Our own unpublished observations have found very poor levels of colonisation by AMF  
16 (near absent) in seedlings of acacias and eucalypts in recently restored sites (Tibbett & Ryan  
17 unpublished).

18 In the light of potential P toxicities in tree seedlings, and the prospect for symbiotic mitigation  
19 of such effects, we investigated two linked hypotheses anticipating contrasting responses for two  
20 species with distinctive ecological strategies: *Acacia celastrifolia*, a large understorey ruderal legume  
21 that exhibits a strong positive growth as a seedling in the field and jarrah, the dominant overstorey  
22 tree which constitutes around 80% of stems in the native forest (Daws *et al.*, 2015; Tibbett *et al.*,  
23 2020). Our first hypothesis was that *A. celastrifolia* would be highly responsive to P-addition over a  
24 wide range of exogenous supply whereas Jarrah would not and would potentially show signs of  
25 growth depression and toxicity. Based on the results of our first experiment, our second hypothesis  
26 was that AMF inoculation would alter the response in terms of P-supply, growth and uptake, leading  
27 to a suppression in acacia growth and offer remedial effect on jarrah growth response and P uptake at  
28 high amendment rates.

29

## 1           2. MATERIALS AND METHODS

### 2           2.1. Plant and soil material

3       Seeds of *Eucalyptus marginata* Donn ex Smith (Jarrah) and *Acacia celastrifolia* Benth. were collected  
4       in the northern jarrah forest of Western Australia, ca. 130 km SSE of the state capital Perth (32° 48' S  
5       116° 28' E). The water impermeable seed coat of *A. celastrifolia* was chipped at the end furthest from  
6       the axis using a scalpel and seeds of both species were soaked for 2 h in 1:10 'Seed Starter' smoke  
7       water (Kings Park Botanic Gardens and Parks Authority, Perth, WA). Seeds were sown on the surface  
8       of 10 % agar water and placed at 15°C in the dark.

9           For both experiments, once seeds had commenced germination, seedlings were transplanted  
10       into sealed 9.6 litre pots at a depth of 10 mm. The pots contained c. 4 litres of disinfested topsoil that  
11       had been steamed twice for three hours at 80 °C, dried at 40 °C and then sieved to 4 mm. The topsoil  
12       used in the experiment was also obtained the northern jarrah forest of Western Australia (32° 48' S  
13       116° 28' E). Jarrah forest soils are gravelly with low concentrations of available N, P and K (Tibbett *et al.*  
14       2020) and high rates of P fixation on amorphous iron and aluminium oxides. Ten germinated seeds  
15       were placed into each pot. For the second mycorrhizal inoculation experiment, spores of *Rhizophagus*  
16       *irregularis* (Błaszk., Wubet, Renker & Buscot) C. Walker & A. Schüßler 2010 (formerly *Glomus*  
17       *intraradices*) were placed at the bottom of the hole before the seeds were added. Pots were watered  
18       approximately weekly to 50 % field capacity and seedlings were thinned to the two healthiest plants  
19       after 21 days, and then down to one plant after 31 days.

20           To ensure that only P was limiting in the experiment, and that no nutrient imbalances were  
21       induced by the addition of P, 10 ml of modified Long Ashton's nutrient solution (minus P) was added  
22       to each pot 15 days after seedlings were planted (Cavagnaro *et al.*, 2001). Macronutrients: K<sub>2</sub>SO<sub>4</sub> (20  
23       mM), MgSO<sub>4</sub>·7H<sub>2</sub>O (15 mM), CaCl<sub>2</sub>·2H<sub>2</sub>O (30 mM), FeEDTA (1 mM), (NH<sub>4</sub>)<sub>2</sub>SO<sub>4</sub> (40 mM), NaNO<sub>3</sub>  
24       (80 mM). Micronutrients: H<sub>3</sub>BO<sub>3</sub> (28.6 mg l<sup>-1</sup>), MnCl<sub>2</sub>·4H<sub>2</sub>O (18.1 mg l<sup>-1</sup>), ZnSO<sub>4</sub>·7H<sub>2</sub>O (2.2 mg l<sup>-1</sup>),  
25       CuSO<sub>4</sub>·5H<sub>2</sub>O (0.8 mg l<sup>-1</sup>), NaMoO<sub>4</sub>·2H<sub>2</sub>O (0.25 mg l<sup>-1</sup>).

26

### 27           2.2. Experimental design

28       Twenty-three days after planting, phosphate was added to the P-treatments in the form of potassium  
29       dihydrogen phosphate (KH<sub>2</sub>PO<sub>4</sub>). To ensure a constant ionic background and balanced potassium  
30       levels, potassium chloride (KCl) was added in inverse proportions to KH<sub>2</sub>PO<sub>4</sub> amendments. In  
31       **experiment 1**, eight rates of P-application were used (equivalent to 0, 0.9, 4.5, 13.5, 22.5, 31.5, 40.5  
32       and 81 mg elemental P kg<sup>-1</sup> soil). In **experiment 2** there were four P-application rates (equivalent to 0,  
33       4.5, 30 and 90 P kg<sup>-1</sup> soil) in a two-way factorial combination of P-application rate × mycorrhizal  
34       treatment. Both experiments were established in randomised blocks in a glasshouse, with each block  
35       containing all treatments. The temperature-controlled glasshouse was maintained at temperatures  
36       between 18°C and 28°C. Pots were regularly re-randomised throughout the growing period. All  
37       treatments were replicated six times for experiment 1 and four times for experiment 2.

1

### 2 **2.3. Mycorrhizal activity (experiment 2)**

3 Thirteen days after planting and at the end of the experiment (188 days), seedlings were screened for  
4 evidence of colonisation by AMF. Roots were cleared using KOH then stained using lactic-glycerol  
5 blue and examined by light microscopy for evidence of colonisation (Brundrett *et al.*, 1996). At the  
6 end of the experiment, AM spores were also extracted from 150 g of soil sampled away from the  
7 middle of the pots following wet sieving and sucrose centrifugation (Walker *et al.*, 1982).

8

### 9 **2.4. Plant measurements**

10 For **experiment 1**, plants were harvested 213 days after sowing and roots and shoots dried separately  
11 at 70 °C for dry weight determination. For **experiment 2**, plants were harvested for dry mass (DM)  
12 determination 53 or 188 days after sowing. In both experiments, plants were carefully removed from  
13 the growing medium, roots washed with water and the plants separated into roots and shoots.

14

### 15 **2.5. Foliar phosphorus concentrations**

16 Dried leaf material from the 213-day (experiment 1) and 188-day harvest (experiment 2) was ground  
17 and then subsampled for digestion. Leaf material was digested using a HNO<sub>3</sub>/HClO<sub>4</sub> mixture with the  
18 diluted digest approximately 10% V/V with respect to HClO<sub>4</sub> (70% W/W). Phosphorus content was  
19 determined using the molybdovanadophosphate method (yellow) and a spectrometer reading at a  
20 wavelength of 460 nm (modified from Simmons, 1975 and 1978).

21

### 22 **2.6. Statistical analysis**

23 For experiment one, two-way ANOVA implemented in Minitab 14 was used to assess, whether there  
24 were effects of (1) species and (2) increasing external P concentration, on either plant DM or leaf P  
25 concentration. Data did not require transformation before analyses as the assumptions of ANOVA  
26 with respect to normality and homogeneity of variances were met. For experiment 2, two-way  
27 ANOVA was used to assess, for each of the two species, the effect of (1) inoculation with AMF and  
28 (2) external P concentration on either plant DM or leaf P concentration. Finally, for experiment 2, for  
29 the plants of each of the study species inoculated with AMF, two-way ANOVA was used to assess the  
30 interaction of (1) study species and (2) external P concentration on spore count in the soil at the end of  
31 the experiment. Spore counts were  $\log_{10}(n + 1)$  transformed to ensure normality.

### 1        3. RESULTS

#### 2        3.1. Effect of external P concentration on dry mass and leaf P of non-mycorrhizal plants 3        (experiment 1)

4        In experiment 1 with non-mycorrhizal plants, there was a significant effect of P-application rate on  
5        plant DM after 213 days (Two-way ANOVA  $P < 0.001$ ), but the two species (*A. celastrifolia* and *E.*  
6        *marginata*) responded differently to applied-P (Two-way ANOVA  $P < 0.05$ ; Figure 1). For *A.*  
7        *celastrifolia* there was an initial rapid increase in DM as P-application rate increased from 0 to 15 mg  
8         $\text{kg}^{-1}$  soil. At higher P-application rates, the rate of increase in DM declined. Nonetheless, total DM at  
9        the highest application rate (81 mg  $\text{kg}^{-1}$  soil) was 10 $\times$  higher than at 0 mg P  $\text{kg}^{-1}$  soil (Figure 1). For *E.*  
10        *marginata*, there was also an initial increase in DM as P-application rate increased from 0 to 15 mg  $\text{kg}^{-1}$   
11        soil (Figure 1). However, at P-application rates greater than 15 mg  $\text{kg}^{-1}$ , DM declined: plant mass at  
12        the P-application rate of 15 mg  $\text{kg}^{-1}$  was more than twice that at 81 mg  $\text{kg}^{-1}$  (Figure 1).

13        In experiment 1, leaf P concentrations of *A. celastrifolia* were ca. 0.65 mg  $\text{g}^{-1}$  DM for plants at  
14        the nil P application-rate, then increasing to a maximum of ca. 3.2 mg  $\text{g}^{-1}$  DM at the P-application rate  
15        of 81 mg  $\text{kg}^{-1}$  soil (Figure 2). For *E. marginata* leaf P was ca. 0.22 mg  $\text{g}^{-1}$  DM at nil P-applicator rate  
16        (Figure 2) and increased rapidly with P application reaching ca. 9 mg  $\text{g}^{-1}$  DM at the P-application rate  
17        of 30 mg  $\text{kg}^{-1}$ . As the P- application rate increased to 80 mg  $\text{kg}^{-1}$ , leaf P concentrations remained at ca.  
18        9 mg  $\text{g}^{-1}$  DM (Figure 2). These responses were reflected in significant main effects of P-application rate  
19        and species as well as a significant P-application  $\times$  species interaction (Two-way ANOVA,  $P <$   
20        0.001), a significant ( $P < 0.001$ ) and a non-significant main effect of P-application ( $P < 0.001$ ) on leaf  
21        P. For *E. marginata* the leaf P concentration corresponding to maximum plant DM accumulation, and  
22        above which DM accumulation declined, was ca. 4 mg  $\text{g}^{-1}$  DM (Figures 1 and 2).

23

#### 24        3.2. Effect of AM colonisation on dry mass and leaf P (experiment 2)

25        For experiment 2, evidence of early colonisation (6-29 %) by AM was found in four of the twelve  
26        samples taken (one *A. celastrifolia* and three *E. marginata*). Roots taken at the end of the experiment  
27        did not clear properly and were not able to be assessed reliably and consequently were discarded.  
28        Spore counts from mycorrhizal pots were low (under 100 per 150 g soil) for both *A. celastrifolia* and  
29        *E. marginata* at the nil P-application rate. There was a significant effect of plant species on sporulation  
30        in the inoculated treatment (Two-way ANOVA,  $P < 0.01$ ) with sporulation varying greatly between  
31        the species at the nil P-application rate, peaking at 4.5 mg  $\text{kg}^{-1}$  P for *E. marginata* yet remaining fairly  
32        low at all P application rates (Table 1). In contrast, sporulation continued increased with P application  
33        for *A. celastrifolia*, peaking at 90 mg  $\text{kg}^{-1}$  P with a mean of 276 spores per 150 g of soil. This  
34        difference in response between the two species was reflected in the P application rate  $\times$  species  
35        interaction being highly significant (Two-way ANOVA,  $P < 0.001$ ), but the main effect of P  
36        application being non-significant ( $P > 0.05$ ).

1           In experiment 2 with both plants inoculated and non-inoculated with AMF, for the two time  
2 periods that were measured (53 and 188 days), there was a significant effect of P-application rate on  
3 DM (Figure 3AB; Two-way ANOVA,  $P < 0.01$ ). *A. celastrifolia* DM increased with P-application rate  
4 and the rate of increase declined above a P-application rate of 30 mg kg<sup>-1</sup> soil. For *A. celastrifolia*,  
5 there was no effect of AM inoculation on DM accumulation for either measurement interval (Figure  
6 3AB; Two-way ANOVA,  $P > 0.05$ ).

7           At both measurement intervals, DM of non-inoculated *E. marginata* plants increased reaching  
8 a maximum at the P-application rate of 30 mg kg<sup>-1</sup> soil and declined thereafter (Figure 3CD). At a P-  
9 application rate of 90 mg kg<sup>-1</sup> soil, there were visible symptoms of P-toxicity including leaf necrosis.  
10 Further, for the replicate sampled at 53 days after planting, only one of the four replicate plants was  
11 still alive. For plants inoculated with AMF, there was no effect of P-application rate on DM  
12 accumulation. Further, neither a decline in DM nor visible symptoms of P-toxicity were observed at  
13 the highest P-application rate of 90 mg P kg<sup>-1</sup> soil (Figure 3CD). At the second measuring interval  
14 these responses were reflected in a significant P-application rate × AMF inoculation interaction (Two-  
15 way ANOVA,  $P < 0.001$ ). Profound differences between inoculated and non-inoculated plants can be  
16 seen in Figure 4.

17           Leaf P concentration of *A. celastrifolia* increased from ca. 0.6 to 2 mg g<sup>-1</sup> DM as the P-  
18 application rate increased from 0 to 90 mg kg<sup>-1</sup> soil. This response was independent of inoculation  
19 with AMF (Figure 5A; Two-way ANOVA,  $P > 0.05$ ). For non-inoculated *E. marginata* plants, the leaf  
20 P concentration increased from ca. 0.2 to 9 mg g<sup>-1</sup> DM as the P-application rate increased from 0 to 90  
21 mg kg soil<sup>-1</sup> (Figure 5B). However, for plants of *E. marginata* inoculated with AMF, leaf P  
22 concentration did not respond to an increasing P-application rate and remained at ca. 0.5 mg g<sup>-1</sup> DM  
23 across the entire range of P-applications rate which was reflected in a significant P application rate ×  
24 AM inoculation interaction term (Two-way ANOVA,  $P < 0.001$ ; Figure 5B).



#### 1            4. DISCUSSION

2        For non-mycorrhizal plants of *A. celastriifolia*, an increasing P-application rate increased DM up to  
3        high level application rates (80 mg P kg<sup>-1</sup> soil). However, for non-mycorrhizal plants of *E. marginata*,  
4        an increasing P-supply increased growth only at relatively low external P concentrations: thereafter  
5        DM declined with increasing P supply. Similar contrasting patterns in response to increasing P-supply  
6        have been observed previously for a range of Australian species from severely nutrient-impooverished  
7        environments (Grundon, 1972; Groves & Keraitis 1976; Handreck, 1997; Pang *et al.* 2010; de Campos  
8        *et al.*, 2013, Williams *et al.*, 2019). For *E. marginata*, but not *A. celastriifolia*, inoculation with AMF  
9        reduced growth at moderate P supply but facilitated growth at high P supply by regulating leaf P  
10        concentrations.

11            For non-mycorrhizal *E. marginata*, maximum DM was observed at P-application rates of 15-  
12        30 mg kg<sup>-1</sup> soil, before declining at higher P-application rates. Similarly, maximum DM of a range of  
13        Australian natives has been reported to occur across a similar range of P supply (e.g., Bougher *et al.*,  
14        1990; Ryan *et al.*, 2009; Pang *et al.*, 2010; Williams *et al.*, 2019). For example, for the 11 species  
15        studied by Pang *et al.* (2010), maximum growth occurred at P-application rates in the range 12-24 mg  
16        P kg<sup>-1</sup>. Further, for 8 of the 11 species, growth declined at P-application rates greater than those  
17        required for maximum plant DM. Shane *et al.* (2004b) reported that, for a range of species, P-toxicity  
18        occurred at leaf P concentrations of 0.9 to 47 mg g<sup>-1</sup> DM. The leaf P concentrations at which we  
19        observed negative effects on growth of *E. marginata* (> 4 mg g<sup>-1</sup> DM) are at the lower end of these  
20        reported values. However, Williams *et al.* (2019) reported for *Eucalyptus torquata* that a reduction in  
21        growth occurred at leaf P concentrations > 2 mg g<sup>-1</sup> DM. One possible explanation for the difference  
22        between our current values and those reported by Shane *et al.* (2004b) is that the values reported by  
23        Shane and co-workers are for the onset of *visible* symptoms of P-toxicity (e.g., necrosis): our results  
24        and those of Williams *et al.* (2019) indicate the onset of a negative effect on plant growth and not  
25        necessarily the onset of visible symptoms.

26            Leaf P concentrations of non-mycorrhizal *A. celastriifolia* initially increased with increasing P  
27        supply. However, even at higher P supply, leaf P concentrations did not exceed ca. 2 mg g<sup>-1</sup> DM.  
28        Similarly, Williams *et al.* (2019) reported that *Acacia acuminata* exhibited an initially increasing shoot  
29        P concentration in response to increasing P supply, but as P application rates increased further, shoot P  
30        concentration was maintained at ca. 2 mg g<sup>-1</sup> DM. Conversely, *Acacia hemiteles* exhibited increasing  
31        shoot P with increasing P supply: shoot P reached concentrations of ca. 8 mg g<sup>-1</sup> DM, and growth  
32        reduced as shoot P concentration continued to increase (Williams *et al.*, 2019). de Campos *et al.*  
33        (2013) also reported on the ability of two *Acacia* species (*Acacia truncata* and *Acacia xanthina*) to  
34        regulate internal P-concentrations in relation to external P-concentrations. *Acacia truncata* was  
35        unresponsive in terms of DM accumulation as the external P concentration increased, whilst *Acacia*  
36        *xanthina* exhibited declining DM as P increased. These results suggest that the growth response to

1 elevated P, even within co-occurring members of a genus, can be unpredictable as also reported for the  
2 genus *Banksia* (de Campos *et al.*, 2013).

3 We found limited evidence of colonisation by AMF in either species with evidence of  
4 colonisation present in just four of the twelve samples examined. Similarly, low levels of colonisation  
5 have been reported in previous studies with jarrah forest species. For example, Kariman *et al.* (2012)  
6 reported that although evidence of colonisation by AMF of *E. marginata* in a pot experiment was  
7 found in as few as 2.3% of samples, beneficial effects of AMF were still observed. Further, it should  
8 be noted that root colonisation is not necessarily required for positive physiological responses in  
9 plant–fungus interactions (Neumann, 1959; Kariman *et al.*, 2014b). Similar results have also been  
10 reported for ectomycorrhizal fungus colonisation on seedlings of *Eucalyptus diversicolor* where in the  
11 absence of applied P, despite colonisation rates on roots ranging from only 1 to 6%, there was still a  
12 significant growth benefit for seedlings resulting from inoculation (Bougher *et al.* 1990).

13 For *A. celastriifolia*, plant DM was consistently, but not significantly, lower in the AM  
14 inoculation treatment across the entire range of P-application rates. While AMF can increase P-uptake  
15 and result in increased growth (Smith *et al.* 2015), the transfer of carbon from the host plant to the  
16 AMF can also result in negative effects on plant growth. In comparison, inoculation with AMF had  
17 three contrasting effects on DM of *E. marginata*.

18 First, at a low P-application rate (4.5 mg P kg<sup>-1</sup>), at 53 days after planting, there was a positive  
19 classical growth effect of inoculation on DM. While inoculation with AMF did not increase leaf P  
20 concentrations it had increased total P uptake. Similarly, Kariman *et al.* (2014a) reported for 14-week-  
21 old *E. marginata* seedlings grown under P-deficient conditions that inoculation with the AMF *R.*  
22 *irregularis* did not increase leaf P concentration. In contrast, at low external P concentrations Jones *et al.*  
23 *al.* (1998) reported that inoculation with AMF both increased shoot P concentrations and growth of  
24 *Eucalyptus coccifera*.

25 Second, at P-application rate, inoculation with AMF significantly depressed growth  
26 suggesting that at this supply, the association was parasitic rather than mutualistic. Indeed, for a range  
27 of species at elevated P concentrations, associations with AMF have been shown to move from  
28 mutualistic to parasitic (Johnson *et al.*, 1997; Hoeksema *et al.*, 2010; Johnson, 2010).

29 Third, at high P-application rates, inoculation with AMF significantly increased DM,  
30 compared to non-inoculated plants, whilst maintaining leaf P concentrations within a similar range to  
31 that observed at lower external P concentrations. This is not a classical plant growth effect, rather a  
32 suppression to toxicity due to the symbiosis. We posit this mechanism is related to a (down)regulation  
33 of root epidermal transporters which has been observed in AM plants for P, and at high concentrations  
34 for cadmium and putatively arsenic (De Oliveira *et al.*, 2020; Kariman *et al.*, 2014a; Kariman *et al.*,  
35 2016; Nazeri *et al.*, 2014). In nature, where plants are commonly mycorrhizal (Kariman *et al.*, 2018)  
36 this may be a common mechanism whereby plants are protected from toxicities (at least to some  
37 extent) by mycorrhizal symbiosis.

1           Except for our control, nil P treatment, leaf P concentrations for both of our study species  
2 when non-mycorrhizal were higher than concentrations previously reported in plants growing in  
3 relatively undisturbed and unfertilised jarrah forest. For example, values of 0.4-0.45 mg P g<sup>-1</sup> DM have  
4 been reported for *E. marginata* (Hingston *et al.*, 1981, M.I. Daws unpublished data) and 0.3 mg P g<sup>-1</sup>  
5 DM for *A. celsastrifolia* (M.I. Daws unpublished data). For *E. marginata* inoculated with AMF, leaf P  
6 was maintained at concentrations similar to those observed in unfertilised forests across the full range  
7 of P-application rates. Since P is widely applied to newly established *E. marginata* stands following  
8 post mining rehabilitation (Standish *et al.* 2015) investigating the potential role of colonisation by  
9 AMF in moderating P-uptake in the field would be of value, particularly since colonisation of roots in  
10 newly established sites may be limited by the availability of propagules, e.g., spores, hyphae,  
11 colonised roots (Jasper *et al.*, 1991).

12           AMF are generally viewed as being important for increasing P-uptake and facilitating growth  
13 at low external P-concentrations. However, our data support a growing understanding that that by  
14 regulating plant P concentration within a sufficient concentration range, AMF play an important role  
15 at high external P concentrations in enabling plant growth at concentrations that would otherwise  
16 result in reduced growth and P-toxicity.

17

18

## 19 **AUTHOR CONTRIBUTIONS**

20 MT and MR conceived the study. MT designed the study. MD analysed the data. MT and MD  
21 interpreted the data and wrote the manuscript. All authors contributed to the draft manuscript.

22

## 23 **ACKNOWLEDGEMENTS**

24 Our thanks to Russell Beazley, Anna Dudley, Matt Braimbridge, Henning Wallrabenstein and Bridget  
25 Kennedy for their contribution to this work.

26

## 27 **DATA AVAILABILITY STATEMENT**

28 Data sharing is not applicable to this article as all new created data is already contained within this  
29 article.

30

## 31 **REFERENCES**

- 1 Bougher, N.L., Grove, T.S. & Malajczuk, N. (1990) Growth and phosphorus acquisition of Karri  
2 (*Eucalyptus diversicolor* F. Muell.) seedlings inoculated with ectomycorrhizal fungi in relation to  
3 phosphorus supply. *New Phytologist*, 114, 77–85.
- 4 Brundrett, M.C., Ashwath, N. & Jasper, D.A. (1996) Mycorrhizas in the Kakadu region of tropical  
5 Australia. II. Propagules of mycorrhizal fungi in disturbed habitats. *Plant and Soil*, 184, 173–184.
- 6 Cavagnaro, T., Smith, F., Lorimer, M., Haskard, K., Ayling, S. & Smith, S. (2001). Quantitative  
7 development of Paris-type arbuscular mycorrhizas formed between *Asphodelus fistulosus* and  
8 *Glomus coronatum*. *New Phytologist*, 149, 105–113.
- 9 Daws, M.I., Standish, R.J., Koch, J.M., Morald, T.K., Tibbett, M. & Hobbs, R.J. (2015) Phosphorus  
10 fertilisation and large legume species affect jarrah forest restoration after bauxite mining. *Forest  
11 Ecology and Management*, 354, 10–17.
- 12 de Campos, M.C.R., Pearse, S.J., Oliveira, R.S. & Lambers, H. (2013) Downregulation of net  
13 phosphorus-uptake capacity is inversely related to leaf phosphorus-resorption proficiency in four  
14 species from a phosphorus-impooverished environment. *Annals of Botany*, 111, 445–454.
- 15 De Oliveira, V.H., Ullah, I., Dunwell, J.M. & Tibbett, M. (2020) Mycorrhizal symbiosis induces  
16 divergent patterns of transport and partitioning of Cd and Zn in *Populus trichocarpa*.  
17 *Environmental and Experimental Botany*, 171, 103925.
- 18 Gardner, J.H. & Malajczuk, N. (1988) Recolonization of rehabilitated bauxite mine sites in Western  
19 Australia by mycorrhizal fungi. *Forest Ecology and Management*, 24, 27–42.
- 20 Glen, M., Bougher, N.L., Colquhoun, I.J., Vlahos, S., Loneragan, W.A., O'Brien, P.A. & Hardy, G.E.  
21 (2008) Ectomycorrhizal fungal communities of rehabilitated bauxite mines and adjacent, natural  
22 jarrah forest in Western Australia. *Forest Ecology and Management*, 255, 214–225.
- 23 Grant, C.D., Ward, S.C. & Morley, C. (2007) Return of ecosystem function to restored bauxite mines  
24 in Western Australia. *Restoration Ecology*, 15, S94–S103.
- 25 Groves, R.H. & Keraitis, K. (1976) Survival of seedlings of three sclerophyll species at high levels of  
26 phosphorus and nitrogen. *Australian Journal of Botany*, 24, 681–690.
- 27 Grundon, N.J. (1972) Mineral nutrition of some Queensland heath plants. *Journal of Ecology*, 60,  
28 171–181.
- 29 Handreck, K.A. (1991) Interactions between iron and phosphorus in the nutrition of *Banksia ericifolia*  
30 L. f. var. *ericifolia* (Proteaceae) in soil-less potting media. *Australian Journal of Botany*, 39, 373–  
31 384.
- 32 Handreck, K.A. (1997) Phosphorus requirements of Australian native plants. *Australian Journal of  
33 Soil Research*, 35, 241–289.
- 34 Hildebrandt, U., Regvar, M. & Bothe, H. (2007) Arbuscular mycorrhiza and heavy metal tolerance.  
35 *Phytochemistry*, 68, 139–146.

- 1 Hingston, F.J., Dimmock, G.M. & Turton, A.G. (1981) Nutrient distribution in a jarrah (*Eucalyptus*  
2 *marginata* Donn ex Sin.) ecosystem in south-west Western Australia. *Forest Ecology and*  
3 *Management*, 3, 183–207.
- 4 Hoeksema, J.D., Chaudhary, V.B., Gehring, C.A., Johnson, N.C., Karst, J., Koide, R.T., Pringle, A.,  
5 Zabinski, C., Bever, J.D., Moore, J.C., Wilson, G.W.T., Klironomos, J.N. & Umbanhowar, J.  
6 (2010) A meta-analysis of context dependency in plant response to inoculation with mycorrhizal  
7 fungi. *Ecology Letters*, 13, 394–407.
- 8 Huang, C.Y., Shirley, N., Genc, Y., Shi, S. & Langridge, P. (2011) Phosphate utilization efficiency  
9 correlates with expression of low-affinity phosphate transporters and noncoding RNA, *IPSI*, in  
10 barley. *Plant Physiology*, 156, 1217–1229.
- 11 Jasper, D.A. (2007) Beneficial soil microorganisms of the Jarrah forest and their recovery in bauxite  
12 Southwestern Australia. *Restoration Ecology*, 15, S74–S84.
- 13 Jentschke, G. & Goldbold, D.L. (2000) Metal toxicity and ectomycorrhizas. *Physiologia Plantarum*,  
14 109, 107–116.
- 15 Johnson, N.C. (2010) Resource stoichiometry elucidates the structure and function of arbuscular  
16 mycorrhizas across scales. *New Phytologist*, 185, 631–647.
- 17 Johnson, N.C., Graham, J.H. & Smith, F.A. (1997) Functioning of mycorrhizal associations along the  
18 mutualism–parasitism continuum. *New Phytologist*, 135, 575–585.
- 19 Jones, M.D., Durall, D.M. & Tinker, P.B. (1998) A comparison of arbuscular and ectomycorrhizal  
20 *Eucalyptus coccifera*: growth response, phosphorus uptake efficiency and external hyphal;  
21 production. *New Phytologist*, 140, 125–134.
- 22 Kariman, K., Barker, S.J., Finnegan, P.M. & Tibbett, M. (2012) Dual mycorrhizal associations of  
23 jarrah (*Eucalyptus marginata*) in a nurse-pot system. *Australian Journal of Botany*, 60, 661–668.
- 24 Kariman, K., Barker, S.J., Finnegan, P.M. & Tibbett, M. (2014a) Ecto- and arbuscular mycorrhizal  
25 symbiosis can induce tolerance to toxic pulses of phosphorus in jarrah (*Eucalyptus marginata*)  
26 seedlings. *Mycorrhiza*, 24, 501–509.
- 27 Kariman, K., Barker, S.J., Jost, R., Finnegan, P.M. & Tibbett, M. (2014b) A novel plant-fungus  
28 symbiosis benefits the host without forming mycorrhizal structures. *New Phytologist*, 201, 1413–  
29 1422.
- 30 Kariman, K., Barker, S.J., Jost, R., Finnegan, P.M. & Tibbett, M. (2016) Sensitivity of jarrah  
31 (*Eucalyptus marginata*) to phosphate, phosphite, and arsenate pulses as influenced by fungal  
32 symbiotic associations. *Mycorrhiza*, 26, 401–415.
- 33 Kariman, K., Barker, S.J. & Tibbett, M. (2018) Structural plasticity in root-fungal symbioses: diverse  
34 interactions lead to improved plant fitness. *PeerJ*, 6, e6030.
- 35 Koide, R.T. & Mosse, B. (2004) A history of research on arbuscular mycorrhiza. *Mycorrhiza*, 14,  
36 145–163.

- 1 Lambers, H., Juniper, D., Cawthray, G.R., Veneklaas, E.J. & Martinez-Ferri, E. (2002) the pattern of  
2 carboxylate exudation in *Banksia grandis* (Proteaceae) is affected by the form of phosphate added  
3 to the soil. *Plant and Soil*, 238, 111–122.
- 4 Lambers, H., Raven, J.A., Shaver, G.R. & Smith, S.E. (2008) Plant nutrition-acquisition strategies  
5 change with soil age. *Trends in Ecology and Evolution*, 23, 95–103.
- 6 Lambers, H., Shane, M.W., Cramer, M.D., Pearse, S.J. & Veneklaas, E.J. (2006) Root structure and  
7 functioning for efficient acquisition of phosphorus: matching morphological and physiological  
8 traits. *Annals of Botany*, 98, 693–713.
- 9 Nazeri, N.K., Lambers, H., Tibbett, M. & Ryan, M.H. (2014) Moderating mycorrhizas: arbuscular  
10 mycorrhizas modify rhizosphere chemistry and maintain plant phosphorus status within narrow  
11 boundaries. *Plant, Cell and Environment*, 37, 911–921.
- 12 Neumann, R. (1959) Relationships between *Pisolithus tinctorius* (Mich. ex Pers.) Coker et Couch. and  
13 *Eucalyptus camaldulensis* [rostrata] Dehn. *Bulletin of the Research Council of Israel*, 7D, 116.
- 14 Pang, J.Y., Tibbett, M., Denton, M.D., Lambers, H., Siddique, K.H.M., Bolland, M.D.A., Revell, C.K.  
15 & Ryan, M.H. (2010) Variation in seedling growth of 11 perennial legumes in response to  
16 phosphorus supply. *Plant and Soil*, 328, 133–143.
- 17 Ryan, M.H., Ehrenberg, S., Bennett, R.G. Tibbett, M. (2009) Putting the P in *Ptilotus*: a phosphorus-  
18 accumulating herb native to Australia. *Annals of Botany*, 103, 901–911.
- 19 Simmons, W. (1975) Determination of low concentrations of cobalt in small samples of plant material  
20 by flameless atomic absorption spectrophotometry. *Analytical Chemistry*, 47, 2015–2018.
- 21 Simmons, W. (1978) Background absorption error in determination of copper in plants by flame  
22 atomic absorption spectrometry. *Analytical Chemistry*, 50, 870–873.
- 23 Shane, M.W., McCully, M.E. & Lambers, H. (2004b) Tissue and cellular phosphorus storage during  
24 development of phosphorus toxicity in *Hakea prostrata* (Proteaceae). *Journal of Experimental*  
25 *Botany*, 55, 1033–1044.
- 26 Shane, M.W., Szota, C. & Lambers, H. (2004a) A root trait accounting for the extreme phosphorus  
27 sensitivity of *Hakea prostrata* (Proteaceae). *Journal of Experimental Botany*, 27, 991–1004.
- 28 Smith, S.E., Jakobsen, I., Gronlund, M. & Smith, F.A. (2011) Roles of arbuscular mycorrhizas in plant  
29 phosphorus nutrition: interactions between pathways of phosphorus uptake in arbuscular  
30 mycorrhizal roots have important implications for understanding and manipulating plant  
31 phosphorus acquisition. *Plant Physiology*, 156, 1050–1057.
- 32 Smith, S.E., Anderson, I.C. & Smith, F.A. (2015) Mycorrhizal associations and phosphorus  
33 acquisition: from cells to ecosystems. Annual Plant Reviews, vol. 48 (eds W.C. Plaxton & H.  
34 Lambers), pp. 409–439. John Wiley & Sons Inc, Hoboken, NJ, USA.
- 35 Standish, R.J., Daws, M.I., Gove, A.D., Didham, R.K., Grigg, A.H., Koch, J.M. & Hobbs, R.J. (2015)  
36 Long-term data suggest jarrah-forest establishment at restored mine sites is resistant to climate  
37 variability. *Journal of Ecology*, 103, 78–89.

- 1 Standish, R.J., Stokes, B.A., Tibbett, M. & Hobbs, R.J. (2007) Seedling response to phosphate  
2 addition and inoculation with arbuscular mycorrhizas and the implications for old-field  
3 restoration in Western Australia. *Environmental and Experimental Botany*, 61, 58–65.
- 4 Tibbett, M. (2000) Roots, foraging and the exploitation of soil nutrient patches: the role of mycorrhizal  
5 symbiosis. *Functional Ecology*, 14, 397–399.
- 6 Tibbett, M. (2010) Large-scale mine site restoration of Australian eucalypt forests after bauxite  
7 mining: soil management and ecosystem development. In: Batty, L.C., Hallberg, K. (Eds.),  
8 Ecology of Industrial Pollution. Cambridge University Press, UK, pp. 309–326.
- 9 Tibbett, M. & Sanders, F.E. (2002) Ectomycorrhizal symbiosis can enhance plant nutrition through  
10 improved access to discrete organic nutrient patches of high resource quality. *Annals of Botany*,  
11 89, 783–789.
- 12 Tibbett, M., Daws, M.I., George, S.J. & Ryan, M.H. (2020) The where, when and what of phosphorus  
13 fertilisation for seedling establishment in a biodiverse jarrah forest restoration after bauxite  
14 mining in Western Australia. *Ecological Engineering*, 153, 105907.
- 15 Walker, C., Mize, C.W. & McNabb Jr, H.S. (1982) Populations of endogonaceous fungi at two  
16 locations in central Iowa. *Canadian Journal of Botany*, 60, 2518–2529.
- 17 Ward, S.C., Koch, J.M. & Nichols, O.G. (1990) Bauxite mine rehabilitation in the Darling Range,  
18 Western Australia. *Proceedings of the Ecology Society of Australia*, 16, 557–565.
- 19 Williams, A., George, S., Birt, H.W.G., Daws, M.I. & Tibbett, M. (2019) Sensitivity of seedling  
20 growth to phosphorus supply in six tree species of the Australian Great Western Woodlands.  
21 *Australian Journal of Botany*, 67, 390–396.
- 22 Yazici, M.A., Asif, M., Tutus, Y., Ortas, I., Ozturk, L., Lambers, H. & Cakmak, I. (2021) Reduced  
23 root mycorrhizal colonization as affected by phosphorus fertilization is responsible for high  
24 cadmium accumulation in wheat. *Plant and Soil*, <https://doi.org/10.1007/s11104-021-05041-5>
- 25 Ye, D., Clode, P.L., Hammer, T.A., Pang, J., Lambers, H. & Ryan, M.H. (2021) Accumulation of  
26 phosphorus and calcium in different cells protects the phosphorus-hyperaccumulator *Ptilotus*  
27 *exaltatus* from phosphorus toxicity in high-phosphorus soils. *Chemosphere*, 264, 128438.
- 28  
29  
30

- 1 Table 1. The effect of plant species and phosphorus (P)-application rate on the spore count of the  
2 arbuscular mycorrhizal fungus *Rhizophagus irregularis*. Spore counts were taken at the end of  
3 experiment 2 (day 188). Error bars are  $\pm 1$  SE of the mean.

| Plant species               | P-application rate<br>(mg kg <sup>-1</sup> soil) | Spore count      |
|-----------------------------|--------------------------------------------------|------------------|
| <i>Acacia celastrifolia</i> | 0                                                | 45.3 $\pm$ 4.4   |
|                             | 4.5                                              | 117.3 $\pm$ 13.0 |
|                             | 30                                               | 191.8 $\pm$ 27.0 |
|                             | 90                                               | 276.0 $\pm$ 52.5 |
| <i>Eucalyptus marginata</i> | 0                                                | 80.5 $\pm$ 3.5   |
|                             | 4.5                                              | 103.3 $\pm$ 9.0  |
|                             | 30                                               | 58.5 $\pm$ 5.8   |
|                             | 90                                               | 37.0 $\pm$ 4.3   |

4



- 1 **Figure 1.** The effect of P-application rate on plant dry mass of non-mycorrhizal *Acacia celastrifolia*
- 2 and *Eucalyptus marginata* assessed 213 days after sowing. Bars  $\pm$  1 SE.

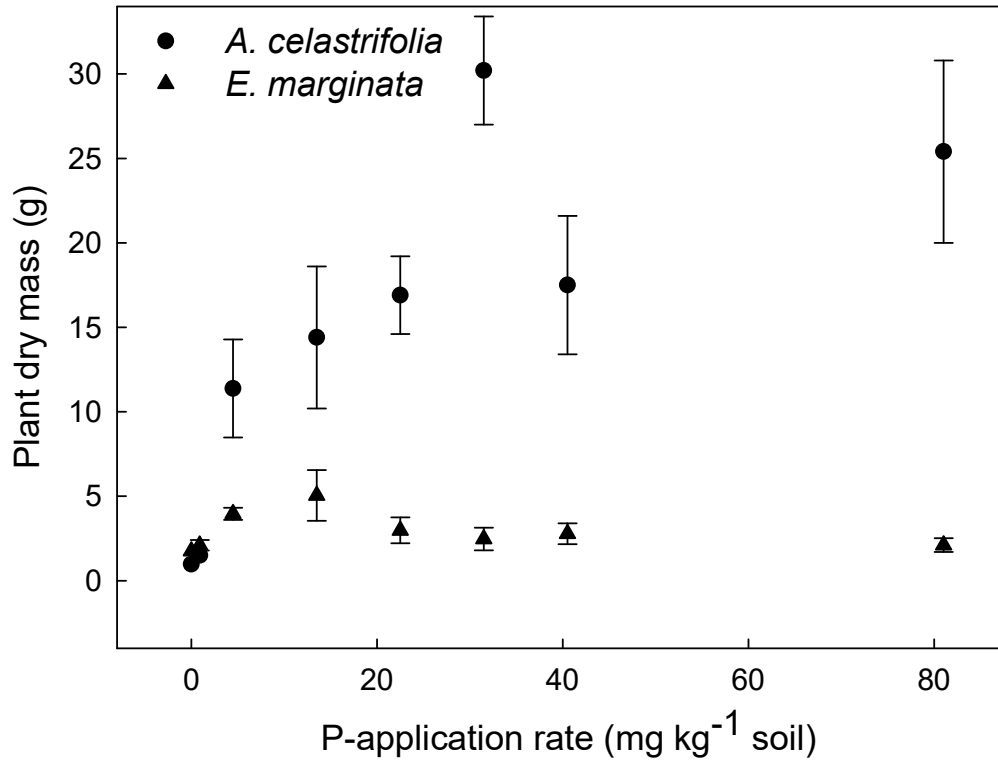

3

- 1 **Figure 2.** The effect of P-application rate on leaf P-concentration for *Acacia celastrifolia* and
- 2 *Eucalyptus marginata* assessed 213 days after planting. Bars  $\pm$  1 SE.

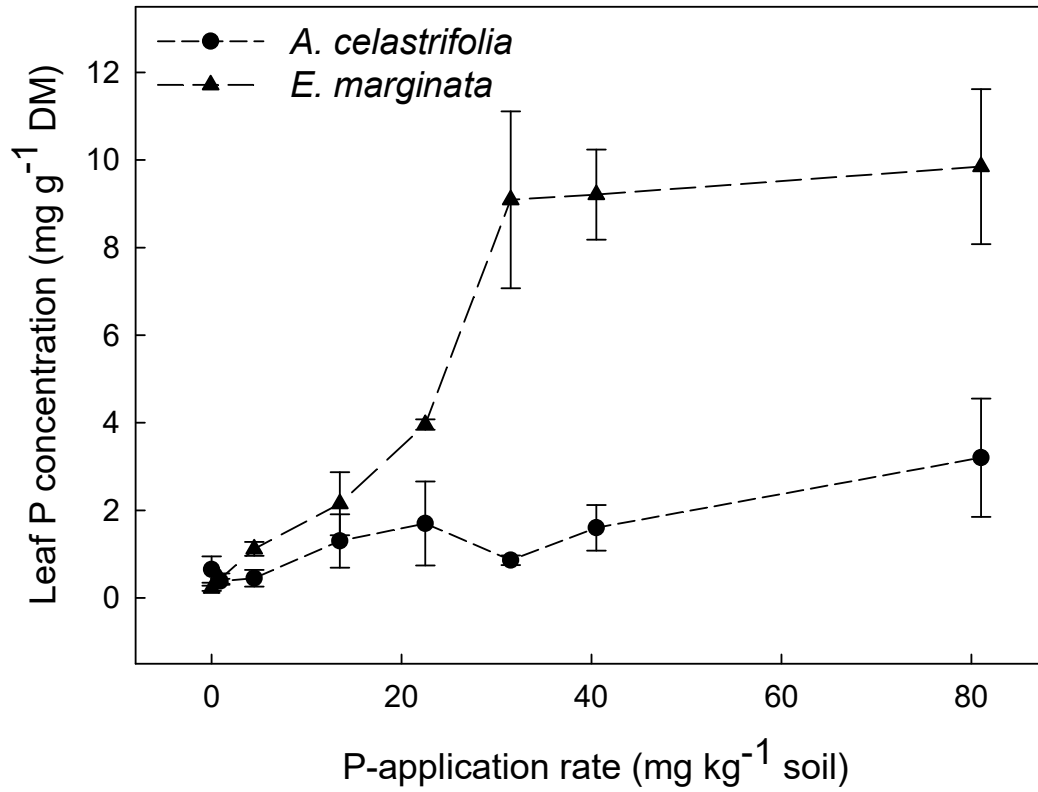

3

4

1 **Figure 3.** The effect of P-application rate and inoculation with arbuscular mycorrhizal fungi (AMF)  
2 on plant dry mass assessed either 53 (A and C) or 188 days after planting (B and D) for *Acacia*  
3 *celastrifolia* and *Eucalyptus marginata*. Note that due to elevated mortality at high P, the 53-day data  
4 point for *E. marginata* at 90 mg P kg<sup>-1</sup> consists of data from one plant only. Bars  $\pm$  1SE.

5

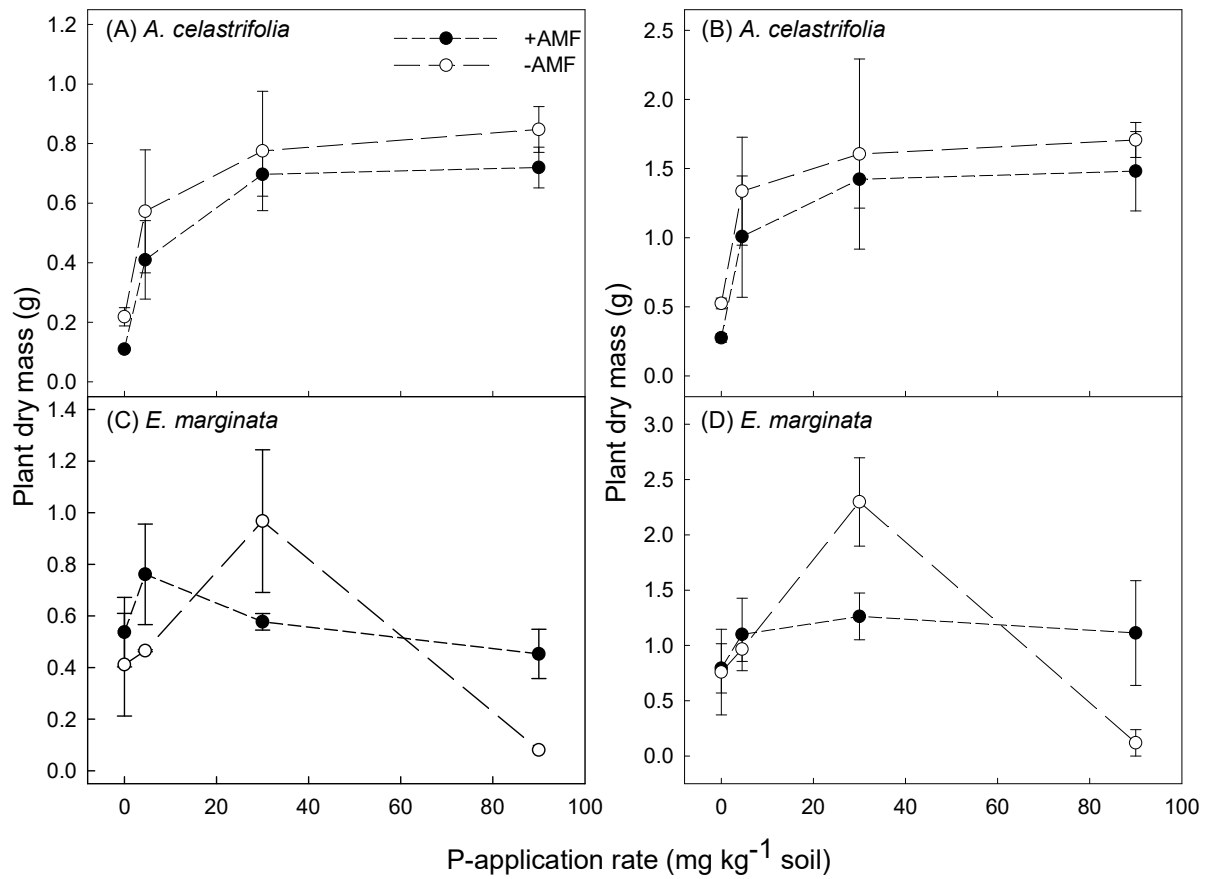

6

7

- 1 **Figure 4.** Photograph of jarrah (*Eucalyptus marginata*) seedlings from **experiment 2** (see methods
- 2 section) grown at a P-application rate of 90 mg kg<sup>-1</sup> soil. The pot on the left was not inoculated with
- 3 spores of arbuscular mycorrhizal fungi whereas the pot on the right was inoculated with spores of
- 4 AMF at the commencement of the experiment. The photograph was taken at the end of the experiment
- 5 (day 188 after planting).

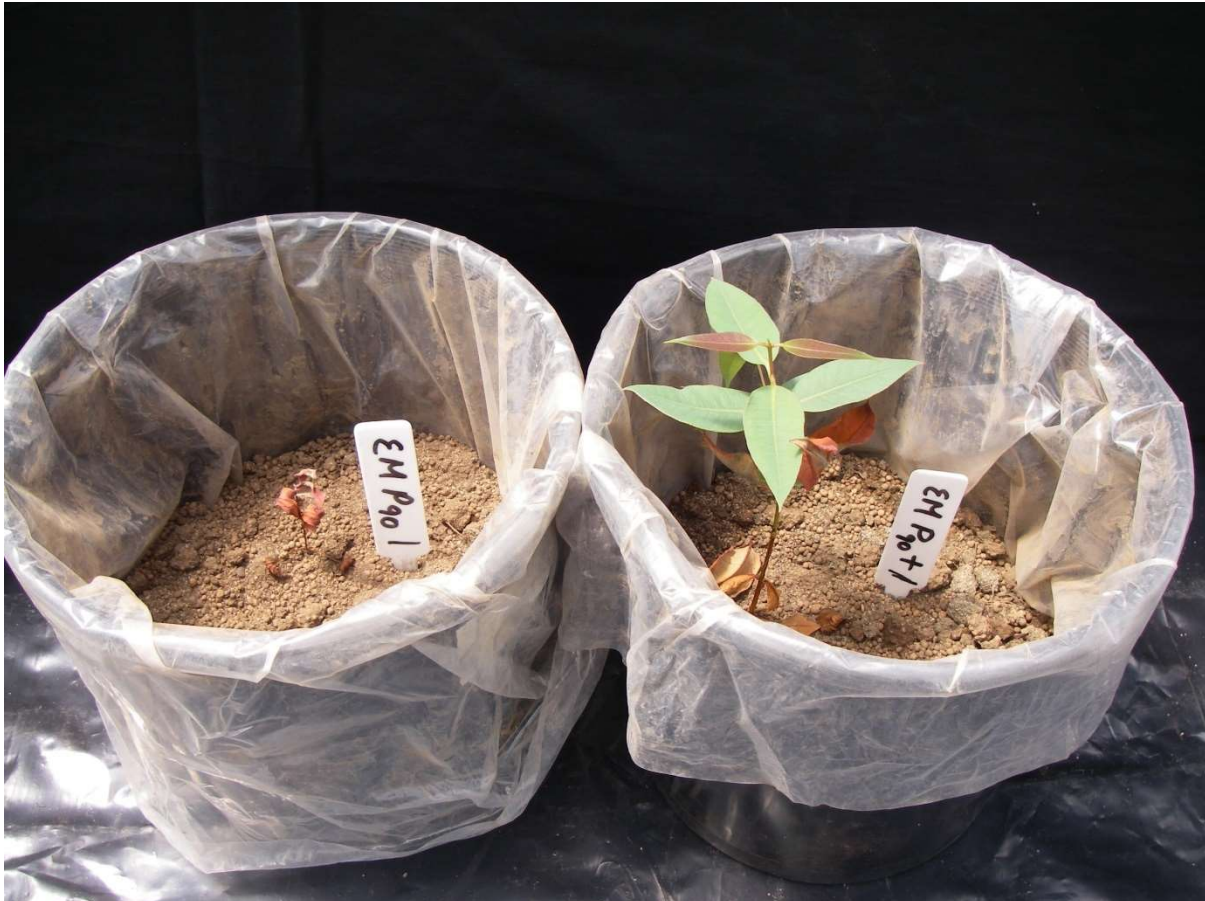

6

- 1 **Figure 5.** The effect of P-application rate and inoculation with arbuscular mycorrhizal fungi (AMF)
- 2 on leaf P-concentration for *Acacia celastrifolia* and *Eucalyptus marginata* assessed 188 days after
- 3 planting. Bars  $\pm$  1 SE.

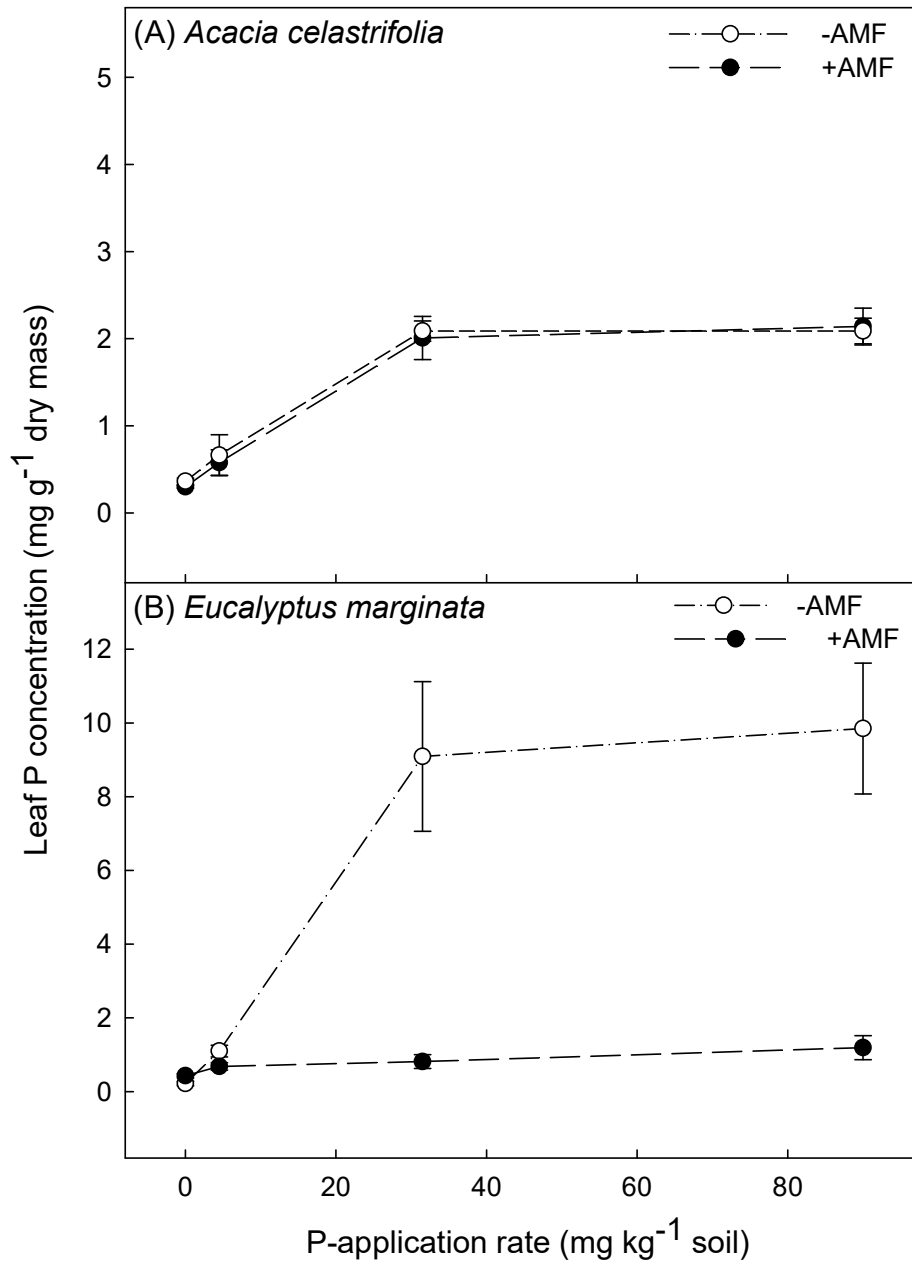

Source: https://biorxiv.org/content/10.1101/2021.09.28.462111v1.full.pdf
